# Supplementary material for: Diagnostic, prognostic and clinical value of left ventricular radial strain to identify paradoxical septal motion in ventilated patients with the acute respiratory distress syndrome: an observational prospective multicenter study
Source: PubMed Central journal article supplement (PMC10623720; doi:10.1186/s13054-023-04716-y), 2023-11-02
Supplement: 13054_2023_4716_MOESM1_ESM.pdf [file 13054_2023_4716_MOESM1_ESM.pdf]

**Diagnostic, prognostic and clinical value of left ventricular radial strain to identify paradoxical septal motion in ventilated patients with the acute respiratory distress syndrome: an observational prospective multicenter study**

Bruno Evrard, MD, MSc, Jean-Baptiste Woillard, PharmD, PhD, Annick Legras , MD, Misylas Bouaoud, Maeva Gourraud, MD, Antoine Humeau, PhD, Marine Goudelin, MD, Philippe Vignon, MD, PhD

**Table of contents**

***Supplementary study design and methods* ..... 2**

    Echocardiography .....2

    Supplementary Data engineering .....2

    R Packages used.....4

***E-Tables* ..... 5**

    E-Table 1: Comparison of the different strain parameters between patients with normal septal motion and with paradoxical septal motion of different grades.....5

    E-Table 2: Comparison of characteristics between patients included and excluded from the longitudinal analysis .....6

    E-Table 3: Multivariate Time dependent Cox Model Regression using assessment only with conventional two-dimensional assessment alone and with the association of LV radial strain.....8

***E-Figures* ..... 9**

    E-Figure 1: Flowchart of the study .....9

    E-Figure 2: Boxplots with density plots comparing right ventricles parameters stratified by the grade of septal motion. ....10

    E-Figure 3: Boxplots with density plots comparing the time difference between time-to-peak and the time of aortic valve closure in each of left ventricular segment .....11

    E-Figure 4: Boxplots with density plots comparing the time difference between time-to-peak of left ventricular septal segments and anterior or inferior segments in each grade of septal motion .....12

***STROBE Statement* ..... 13**

***Supplementary references* ..... 15**

## Supplementary study design and methods

### Echocardiography

In the apical four-chamber view, M-mode-derived tricuspid annular plane systolic excursion (TAPSE) and maximal systolic tissue Doppler velocity recorded at the lateral aspect of the tricuspid annulus were measured. Right atrio-ventricular systolic pressure gradient was calculated using the simplified Bernouilli's equation applied to the maximal velocity of the tricuspid regurgitant jet [1]. LV outflow tract velocity-time integral (VTI) was measured in the transgastric 120° view using pulsed-wave Doppler [2].

### Supplementary Data engineering

- (i) The difference of area between partial area under LV segmental strain curves which was calculated as following to best capture differences which occurred between curves of the septal or lateral segments and the anterior or posterior segments:
- $pAUC [Mid\ anteroseptal\ segment] - pAUC [mid\ anterior\ segment]$
  - $pAUC [Mid\ anteroseptal\ segment] - pAUC [mid\ inferior\ segment]$
  - $pAUC [Mid\ inferoseptal\ segment] - pAUC [mid\ anterior\ segment]$
  - $pAUC [Mid\ inferoseptal\ segment] - pAUC [mid\ inferior\ segment]$
  - $pAUC [Mid\ anterolateral\ segment] - pAUC [mid\ anterior\ segment]$
  - $pAUC [Mid\ anterolateral\ segment] - pAUC [mid\ inferior\ segment]$
  - $pAUC [Mid\ inferolateral\ segment] - pAUC [mid\ anterior\ segment]$
  - $pAUC [Mid\ inferolateral\ segment] - pAUC [mid\ inferior\ segment]$

(ii) The time difference between the time-to-peak (TTP) and the time of aortic valve closure (AVC) expressed in percentage of the cardiac cycle was calculated as follows to best capture differences which occurred between LV strain curves of the septal or lateral segments on the one hand, and of the anterior or posterior segments on the other hand:

- $TTP [Mid\ anteroseptal\ segment] - time [AVC]$
- $TTP [Mid\ inferoseptal\ segment] - time [AVC]$
- $TTP [Mid\ anterolateral\ segment] - time [AVC]$
- $TTP [Mid\ inferolateral\ segment] - time [AVC]$
- $TTP [Mid\ anterior\ segment] - time [AVC]$
- $TTP [Mid\ inferior\ segment] - time [AVC]$

(iii) The time difference of the time-to-peak (TTP) between LV segments expressed in percentage of the cardiac cycle was calculated as follows to best capture differences which occurred between LV strain curves of the septal or lateral segments on the one hand and of the anterior or posterior segments on the other hand:

- $TTP [Mid\ anteroseptal\ segment] - TTP [mid\ anterior\ segment]$
- $TTP [Mid\ anteroseptal\ segment] - TTP [mid\ inferior\ segment]$
- $TTP [Mid\ inferoseptal\ segment] - TTP [mid\ anterior\ segment]$
- $TTP [Mid\ inferoseptal\ segment] - TTP [mid\ inferior\ segment]$
- $TTP [Mid\ anterolateral\ segment] - TTP [mid\ anterior\ segment]$
- $TTP [Mid\ anterolateral\ segment] - TTP [mid\ inferior\ segment]$
- $TTP [Mid\ inferolateral\ segment] - TTP [mid\ anterior\ segment]$

- $TTP [Mid\ inferolateral\ segment] - TTP [mid\ inferior\ segment]$

## R Packages used

### *Processing of data:*

- “tidyverse”
- “qlabRaw2RectangularData” [3]

### *Statistical analysis:*

- Time dependent Cox model: “survival”
- Inter rater reliability: “irr” and “boost”
- Area under the curves: “pROC”
- Other: “epiR”
- Statistic summary: “gtsummary” [4]

### *Figures:*

- “GGally”
- “ComplexHeatmap” [5]
- “Ggalluvial” [6]
- “Ggstatsplot” [7]

## E-Tables

**E-Table 1:** Comparison of the different strain parameters between patients with normal septal motion and with paradoxical septal motion of different grades

|                                                                                                 | Normal Septal Motion,<br>N = 162 <sup>1</sup> | Transient septal flattening<br>N = 100 <sup>1</sup> | Sustained septal flattening<br>or inversed septal bulging,<br>N = 48 <sup>1</sup> | p-value <sup>2</sup> | Adjusted<br>p-value <sup>3</sup> |
|-------------------------------------------------------------------------------------------------|-----------------------------------------------|-----------------------------------------------------|-----------------------------------------------------------------------------------|----------------------|----------------------------------|
| <b>Time for Aortic valve closure (% cycle)</b>                                                  | 39 (36, 43)                                   | 39 (35, 42)                                         | 39 (36, 43)                                                                       | 0.3                  | 0.4                              |
| <b>Time to peak for each segment (% cycle)</b>                                                  |                                               |                                                     |                                                                                   |                      |                                  |
| <i>MAS</i>                                                                                      | 39 (34, 45)                                   | 39 (35, 43)                                         | 42 (38, 48)                                                                       | 0.041                | 0.2                              |
| <i>MIS</i>                                                                                      | 39 (35, 45)                                   | 39 (36, 45)                                         | 41 (37, 52)                                                                       | 0.2                  | 0.3                              |
| <i>MAL</i>                                                                                      | 39 (35, 46)                                   | 40 (36, 46)                                         | 44 (37, 47)                                                                       | 0.3                  | 0.3                              |
| <i>MIL</i>                                                                                      | 38 (34, 44)                                   | 38 (35, 43)                                         | 42 (36, 47)                                                                       | 0.049                | 0.2                              |
| <i>MA</i>                                                                                       | 39 (35, 46)                                   | 37 (35, 42)                                         | 38 (31, 44)                                                                       | 0.12                 | 0.2                              |
| <i>MI</i>                                                                                       | 39 (35, 47)                                   | 38 (35, 42)                                         | 38 (32, 44)                                                                       | 0.13                 | 0.2                              |
| <b>Area under the strain curve of each segment between 33 and 66% of cycle (cm<sup>2</sup>)</b> |                                               |                                                     |                                                                                   |                      |                                  |
| <i>MAS</i>                                                                                      | 2,567 (2,223, 2,801)                          | 2,556 (2,230, 2,788)                                | 2,738 (2,371, 2,946)                                                              | 0.12                 | 0.2                              |
| <i>MIS</i>                                                                                      | 2,535 (2,275, 2,833)                          | 2,535 (2,222, 2,767)                                | 2,599 (2,203, 2,813)                                                              | 0.8                  | 0.8                              |
| <i>MAL</i>                                                                                      | 2,557 (2,302, 2,837)                          | 2,570 (2,239, 2,812)                                | 2,635 (2,184, 2,857)                                                              | 0.8                  | 0.8                              |
| <i>MIL</i>                                                                                      | 2,575 (2,199, 2,778)                          | 2,522 (2,205, 2,768)                                | 2,708 (2,383, 2,896)                                                              | 0.2                  | 0.3                              |
| <i>MA</i>                                                                                       | 2,670 (2,417, 2,881)                          | 2,562 (2,176, 2,797)                                | 2,388 (1,675, 2,739)                                                              | <0.001               | 0.007                            |
| <i>MI</i>                                                                                       | 2,718 (2,442, 2,891)                          | 2,587 (2,276, 2,824)                                | 2,442 (1,743, 2,820)                                                              | 0.002                | 0.014                            |

<sup>1</sup> Median (IQR)

<sup>2</sup> Kruskal-Wallis rank sum test

<sup>3</sup> False discovery rate correction for multiple testing

**Abbreviations:** AVC: Aortic valve closure; MAS: Mid-antero-septal; MIS: Mid-infero-septal; MAL: Mid-anterolateral; MIL: Mid-inferolateral; MA: Mid-anterior; MI: Mid-inferior

**E-Table 2: Comparison of characteristics between patients included and excluded from the longitudinal analysis**

| Characteristic                                            | Excluded (n=115) <sup>1</sup> | Included (n=67) <sup>1</sup> | p-value <sup>2</sup> |
|-----------------------------------------------------------|-------------------------------|------------------------------|----------------------|
| Age (years)                                               | 65 (60, 72)                   | 69 (61, 72)                  | 0.2                  |
| Men                                                       | 69 (62%)                      | 47 (73%)                     | 0.13                 |
| Body Mass Index (kg/m <sup>2</sup> )                      | 29.5 (26.6, 34.7)             | 29.6 (26.0, 34.0)            | 0.7                  |
| Simplified Acute Physiology Score II                      | 35 (29, 40)                   | 36 (31, 42)                  | 0.4                  |
| Sequential Organ Failure Assessment                       | 4 (3, 5)                      | 4.(3, 5)                     | 0.6                  |
| Cardiopathy                                               | 9 (8.1%)                      | 8 (13%)                      | 0.3                  |
| Hypertension                                              | 64 (58%)                      | 35 (55%)                     | 0.7                  |
| COPD                                                      | 1 (50%)                       | 6 (75%)                      | >0.9                 |
| Chronic renal failure                                     | 10 (9.0%)                     | 4 (6.3%)                     | 0.5                  |
| Mean Blood Pressure (mmHg)                                | 83 (75, 97)                   | 98 (89, 107)                 | <0.001               |
| Central Venous Pressure (mmHg)                            | 8 (7, 10)                     | 10 (8, 11)                   | 0.3                  |
| PaO <sub>2</sub> /FiO <sub>2</sub> (mmHg)                 | 130 (97, 171)                 | 86 (71, 124)                 | <0.001               |
| Bicarbonates (mmol/L)                                     | 25.5 (23.5, 27.5)             | 24.4 (22.6, 25.8)            | 0.008                |
| Creatinin (μmol/L)                                        | 66 (54, 86)                   | 66 (59, 87)                  | 0.5                  |
| Lactates (mmol/L)                                         | 1.50 (1.19, 1.90)             | 1.07 (0.92, 1.54)            | <0.001               |
| Platelets (MenG/L)                                        | 237 (182, 294)                | 265 (183, 322)               | 0.2                  |
| Vasopressors                                              | 10 (9.0%)                     | 5 (7.8%)                     | 0.8                  |
| Number of TEE                                             | 1(1, 1)                       | 3 (2, 4)                     | <0.001               |
| First day of TEE assessment                               | 1 (1, 1)                      | 1(1, 1)                      | 0.5                  |
| Left Ventricular ejection fraction (%)                    | 60 (52, 67)                   | 57 (48, 65)                  | 0.2                  |
| RV/LV end diastolic area ratio                            | 0.80 (0.70, 0.90)             | 0.71 (0.70, 0.93)            | 0.9                  |
| End-Systolic Eccentricity Index                           | 1.10 (1.00, 1.20)             | 1.10 (1.00, 1.20)            | >0.9                 |
| TAPSE (mm)                                                | 22.0 (19.0, 24.4)             | 23.0 (19.0, 26.0)            | 0.3                  |
| Systolic right atrio-ventricular pressure gradient (mmHg) | 29 (21, 36)                   | 36 (29, 45)                  | <0.001               |
| RV freewall strain (%)                                    | 26 (22, 31)                   | 28 (25, 31)                  | 0.11                 |
| ACP grade                                                 |                               |                              | 0.13                 |

| Characteristic                                                                       | Excluded<br>(n=115) <sup>1</sup> | Included<br>(n=67) <sup>1</sup> | p-value <sup>2</sup> |
|--------------------------------------------------------------------------------------|----------------------------------|---------------------------------|----------------------|
| <i>No ACP</i>                                                                        | 81 (70%)                         | 37 (56%)                        |                      |
| <i>Moderate</i>                                                                      | 21 (18%)                         | 16 (24%)                        |                      |
| <i>Severe</i>                                                                        | 13 (11%)                         | 13 (20%)                        |                      |
| <b>ICU mortality</b>                                                                 | 24 (21%)                         | 32 (48%)                        | <0.001               |
| <sup>1</sup> Median (IQR); n (%)                                                     |                                  |                                 |                      |
| <sup>2</sup> Wilcoxon rank sum test; Pearson's Chi-squared test; Fisher's exact test |                                  |                                 |                      |

**E-Table 3:** Multivariate Time dependent Cox Model Regression using assessment only with conventional two-dimensional assessment alone and with the association of LV radial strain

|                               | 2D alone        |                     |         | 2D and LV radial strain |                     |         |
|-------------------------------|-----------------|---------------------|---------|-------------------------|---------------------|---------|
|                               | HR <sup>1</sup> | 95% CI <sup>1</sup> | p-value | HR <sup>1</sup>         | 95% CI <sup>1</sup> | p-value |
| <b>Acute cor pulmonale</b>    |                 |                     | 0.22    |                         |                     | 0.002   |
| <i>No Acute cor pulmonale</i> | —               | —                   |         | —                       | —                   |         |
| <b>Moderate grade 1</b>       | 1.47            | 0.56, 3.83          |         | 2.1                     | 0.73, 6.04          |         |
| <b>Severe grade 1</b>         | 1.57            | 0.43, 5.67          |         | 1.2                     | 0.24, 5.96          |         |
| <b>Severe grade 2</b>         | 2.8             | 1.11, 7.09          |         | 6.27                    | 2.28, 17.2          |         |
| <b>SAPS II (per point)</b>    | 0.99            | 0.94, 1.05          | 0.8     | 0.99                    | 0.93, 1.05          | 0.69    |
| <b>Age (per year)</b>         | 1.05            | 0.99, 1.11          | 0.07    | 1.04                    | 0.98, 1.11          | 0.14    |



## E-Figures

E-Figure 1: Flowchart of the study

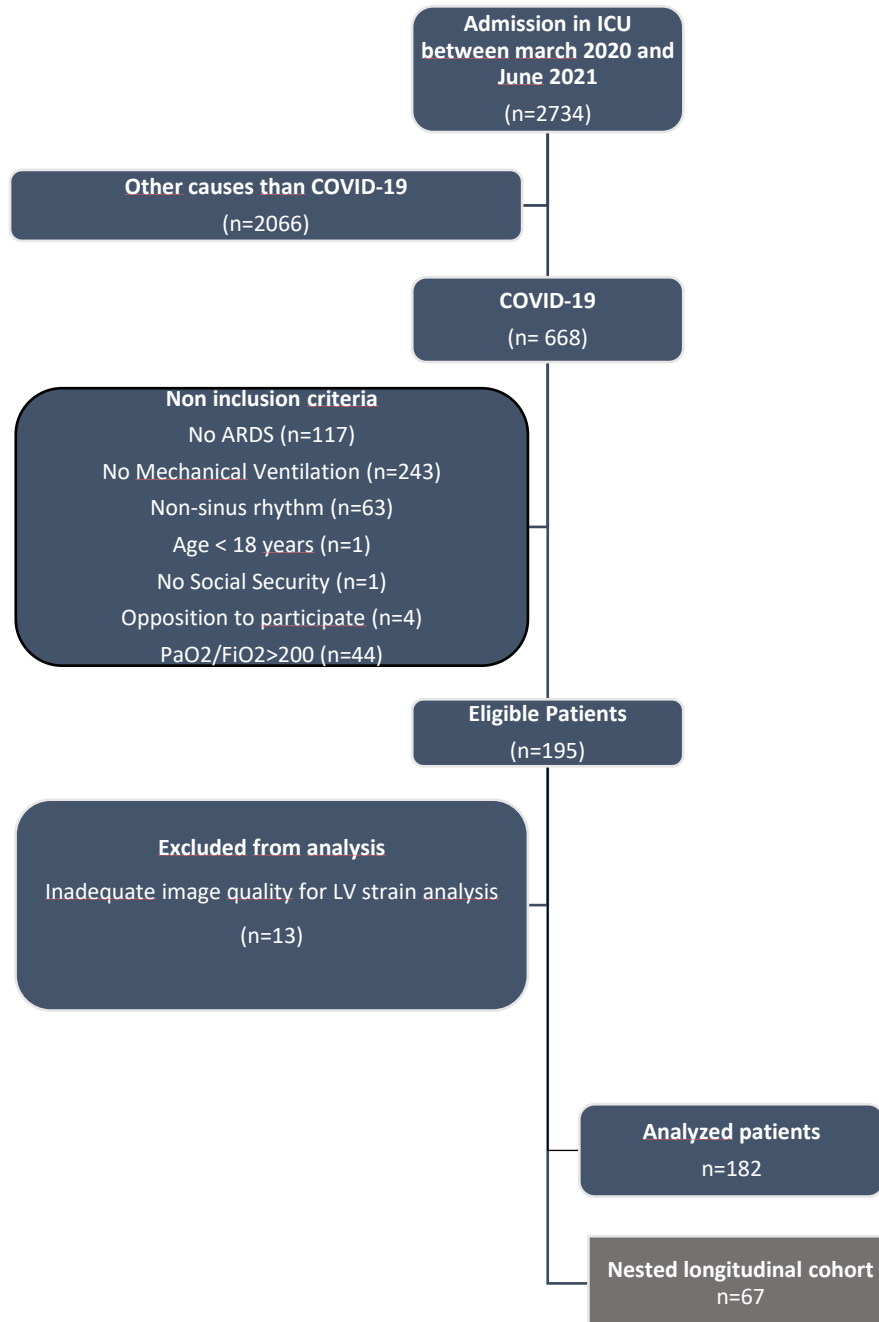

**E-Figure 2:** Boxplots with density plots comparing right ventricles parameters stratified by the grade of septal motion. P-value is provided only when significant and adjusted with Benjamini-Hochberg method to take account of the multiplicity of test.

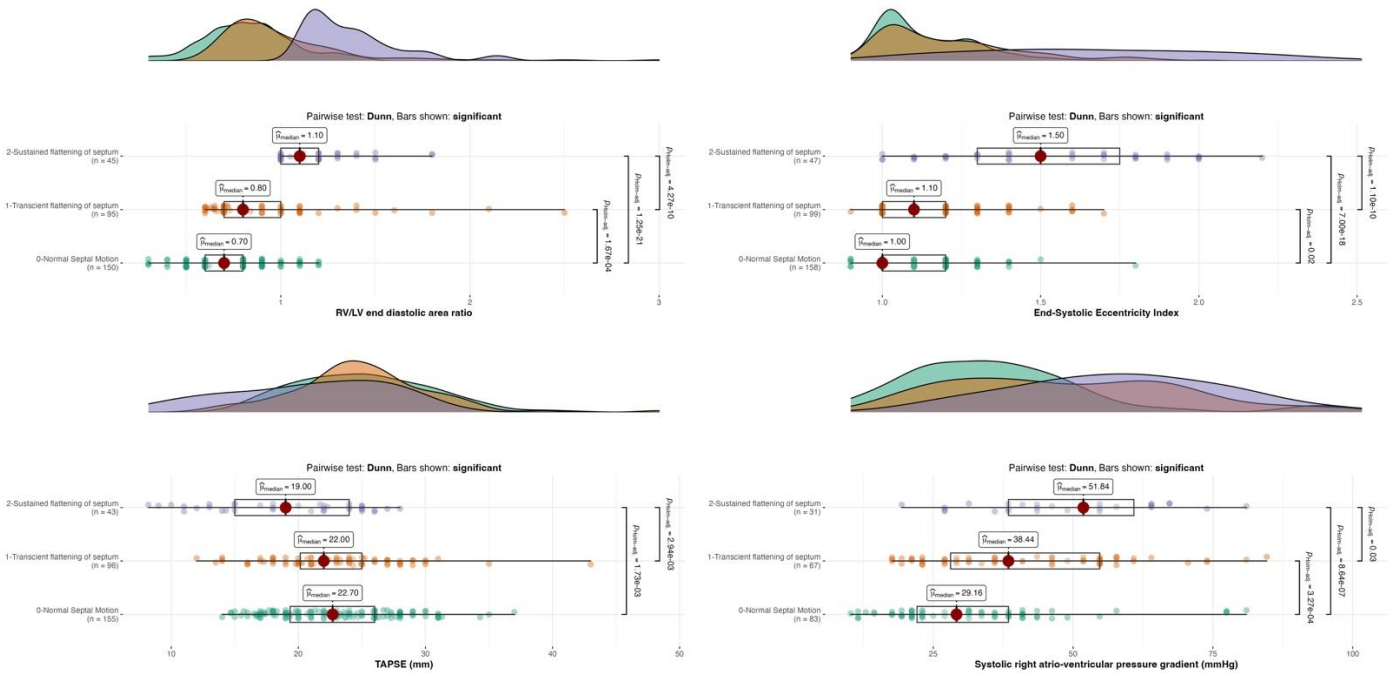

**Abbreviations:** RV: Right ventricle; LV: Left ventricle; TAPSE: Tricuspid annular plane systolic excursion

**E-Figure 3:** Boxplots with density plots comparing the time difference between time-to-peak and the time of aortic valve closure in each of left ventricular segment, and according to the grade of septal motion. In the left upper corner is a schematic representation of left ventricular segmentation used for the comparison. P-value is provided only when significant and adjusted with Benjamini-Hochberg method to take account of the multiplicity of test.

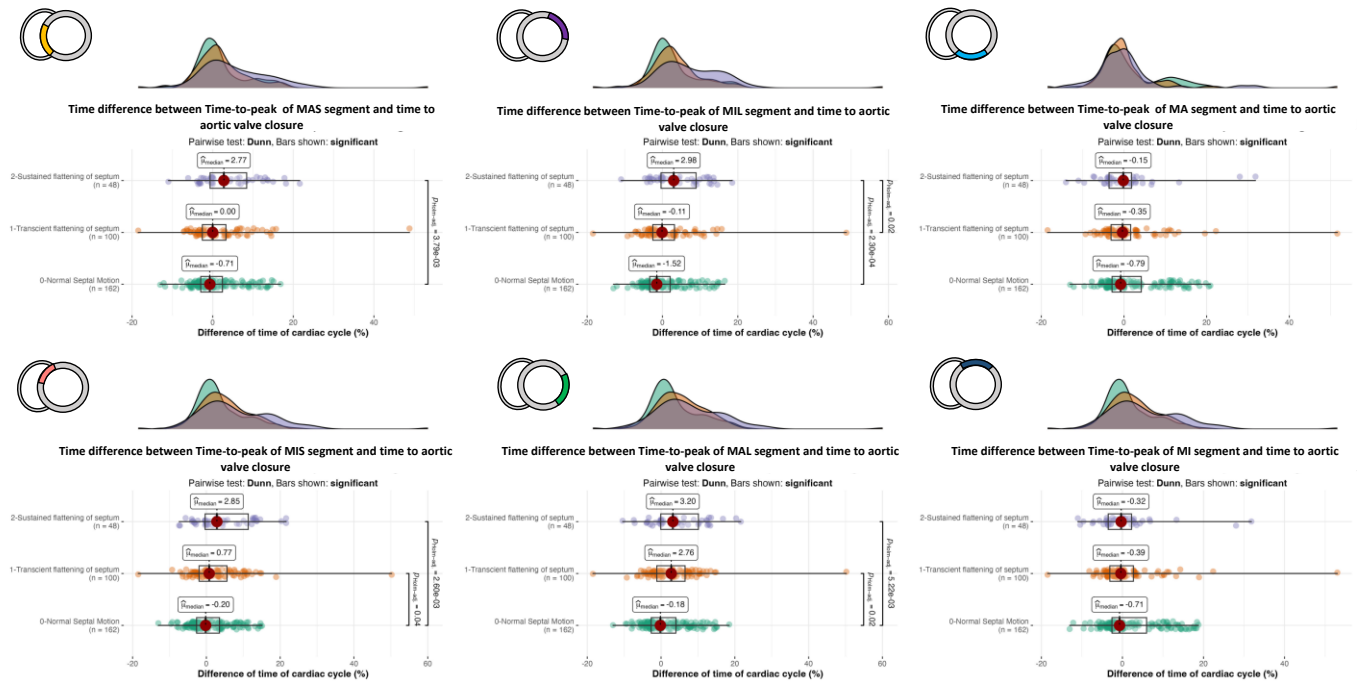

**Abbreviations:** AVC: aortic valve closure; MAS: Mid-anteroseptal; MIL: Mid-inferolateral; MA: Mid-anterior; MIS: Mid-infero-septal; MAL: Mid-anterolateral; MI: Mid-inferior

**E-Figure 4:** Boxplots with density plots comparing the time difference between time-to-peak of left ventricular septal segments and anterior or inferior segments in each grade of septal motion. In the left upper corner is a schematic representation of left ventricular segmentation used for the comparison. P-value is provided only when significant and adjusted with Benjamini-Hochberg method to take account of the multiplicity of test.

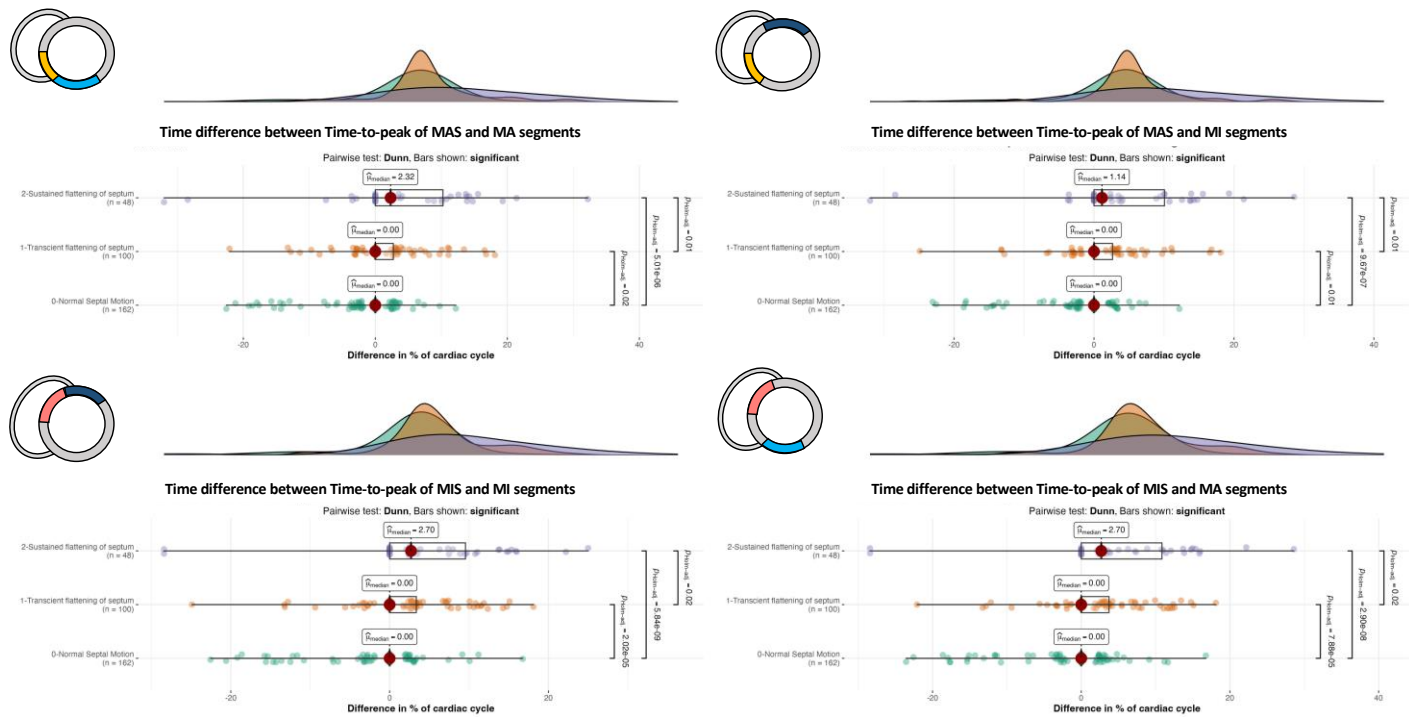

**Abbreviations:** MAS: Mid-anteroseptal; MA: Mid-anterior; MIS: Mid-infero-septal; MI: Mid-inferior

## STROBE Statement

|                              | Item No | Recommendation                                                                                                                                                                                                                                                                                                                                                                                                                                                         | Page No |
|------------------------------|---------|------------------------------------------------------------------------------------------------------------------------------------------------------------------------------------------------------------------------------------------------------------------------------------------------------------------------------------------------------------------------------------------------------------------------------------------------------------------------|---------|
| <b>Title and abstract</b>    | 1       | (a) Indicate the study's design with a commonly used term in the title or the abstract                                                                                                                                                                                                                                                                                                                                                                                 | 1 and 3 |
|                              |         | (b) Provide in the abstract an informative and balanced summary of what was done and what was found                                                                                                                                                                                                                                                                                                                                                                    | 3-4     |
| <b>Introduction</b>          |         |                                                                                                                                                                                                                                                                                                                                                                                                                                                                        |         |
| Background/rationale         | 2       | Explain the scientific background and rationale for the investigation being reported                                                                                                                                                                                                                                                                                                                                                                                   | 6       |
| Objectives                   | 3       | State specific objectives, including any prespecified hypotheses                                                                                                                                                                                                                                                                                                                                                                                                       | 6       |
| <b>Methods</b>               |         |                                                                                                                                                                                                                                                                                                                                                                                                                                                                        |         |
| Study design                 | 4       | Present key elements of study design early in the paper                                                                                                                                                                                                                                                                                                                                                                                                                | 7       |
| Setting                      | 5       | Describe the setting, locations, and relevant dates, including periods of recruitment, exposure, follow-up, and data collection                                                                                                                                                                                                                                                                                                                                        | 7       |
| Participants                 | 6       | (a) <i>Cohort study</i> —Give the eligibility criteria, and the sources and methods of selection of participants. Describe methods of follow-up<br><i>Case-control study</i> —Give the eligibility criteria, and the sources and methods of case ascertainment and control selection. Give the rationale for the choice of cases and controls<br><i>Cross-sectional study</i> —Give the eligibility criteria, and the sources and methods of selection of participants | 7       |
|                              |         | (b) <i>Cohort study</i> —For matched studies, give matching criteria and number of exposed and unexposed<br><i>Case-control study</i> —For matched studies, give matching criteria and the number of controls per case                                                                                                                                                                                                                                                 |         |
| Variables                    | 7       | Clearly define all outcomes, exposures, predictors, potential confounders, and effect modifiers. Give diagnostic criteria, if applicable                                                                                                                                                                                                                                                                                                                               | 8-11    |
| Data sources/<br>measurement | 8*      | For each variable of interest, give sources of data and details of methods of assessment (measurement). Describe comparability of assessment methods if there is more than one group                                                                                                                                                                                                                                                                                   | 8-11    |
| Bias                         | 9       | Describe any efforts to address potential sources of bias                                                                                                                                                                                                                                                                                                                                                                                                              | 8-11    |
| Study size                   | 10      | Explain how the study size was arrived at                                                                                                                                                                                                                                                                                                                                                                                                                              | 10      |
| Quantitative variables       | 11      | Explain how quantitative variables were handled in the analyses. If applicable, describe which groupings were chosen and why                                                                                                                                                                                                                                                                                                                                           | 10      |
| Statistical methods          | 12      | (a) Describe all statistical methods, including those used to control for confounding                                                                                                                                                                                                                                                                                                                                                                                  | 10-11   |
|                              |         | (b) Describe any methods used to examine subgroups and interactions                                                                                                                                                                                                                                                                                                                                                                                                    | 10-11   |
|                              |         | (c) Explain how missing data were addressed                                                                                                                                                                                                                                                                                                                                                                                                                            | 10      |
|                              |         | (d) <i>Cohort study</i> —If applicable, explain how loss to follow-up was addressed                                                                                                                                                                                                                                                                                                                                                                                    | NA      |

|                          |     |                                                                                                                                                                                                                    |                |
|--------------------------|-----|--------------------------------------------------------------------------------------------------------------------------------------------------------------------------------------------------------------------|----------------|
|                          |     | <i>Case-control study</i> —If applicable, explain how matching of cases and controls was addressed<br><i>Cross-sectional study</i> —If applicable, describe analytical methods taking account of sampling strategy |                |
|                          |     | (e) Describe any sensitivity analyses                                                                                                                                                                              | NA             |
| <b>Results</b>           |     |                                                                                                                                                                                                                    |                |
| Participants             | 13* | (a) Report numbers of individuals at each stage of study—eg numbers potentially eligible, examined for eligibility, confirmed eligible, included in the study, completing follow-up, and analysed                  | 12             |
|                          |     | (b) Give reasons for non-participation at each stage                                                                                                                                                               | 12             |
|                          |     | (c) Consider use of a flow diagram                                                                                                                                                                                 | E-Figure 1     |
| Descriptive data         | 14* | (a) Give characteristics of study participants (eg demographic, clinical, social) and information on exposures and potential confounders                                                                           | 12 and Table 1 |
|                          |     | (b) Indicate number of participants with missing data for each variable of interest                                                                                                                                | 12-14          |
|                          |     | (c) <i>Cohort study</i> —Summarise follow-up time (eg, average and total amount)                                                                                                                                   | NA             |
| Outcome data             | 15* | <i>Cohort study</i> —Report numbers of outcome events or summary measures over time                                                                                                                                | 12-14          |
|                          |     | <i>Case-control study</i> —Report numbers in each exposure category, or summary measures of exposure                                                                                                               |                |
|                          |     | <i>Cross-sectional study</i> —Report numbers of outcome events or summary measures                                                                                                                                 |                |
| Main results             | 16  | (a) Give unadjusted estimates and, if applicable, confounder-adjusted estimates and their precision (eg, 95% confidence interval). Make clear which confounders were adjusted for and why they were included       | 12-14          |
|                          |     | (b) Report category boundaries when continuous variables were categorized                                                                                                                                          | 11-12          |
|                          |     | (c) If relevant, consider translating estimates of relative risk into absolute risk for a meaningful time period                                                                                                   | NA             |
| Other analyses           | 17  | Report other analyses done—eg analyses of subgroups and interactions, and sensitivity analyses                                                                                                                     | 14             |
| <b>Discussion</b>        |     |                                                                                                                                                                                                                    |                |
| Key results              | 18  | Summarise key results with reference to study objectives                                                                                                                                                           | 15             |
| Limitations              | 19  | Discuss limitations of the study, taking into account sources of potential bias or imprecision. Discuss both direction and magnitude of any potential bias                                                         | 17-18          |
| Interpretation           | 20  | Give a cautious overall interpretation of results considering objectives, limitations, multiplicity of analyses, results from similar studies, and other relevant evidence                                         | 15-18          |
| Generalisability         | 21  | Discuss the generalisability (external validity) of the study results                                                                                                                                              | 17-18          |
| <b>Other information</b> |     |                                                                                                                                                                                                                    |                |
| Funding                  | 22  | Give the source of funding and the role of the funders for the present study and, if applicable, for the original study on which the present article is based                                                      | 2              |

\*Give information separately for cases and controls in case-control studies and, if applicable, for exposed and unexposed groups in cohort and cross-sectional studies.

**Note:** An Explanation and Elaboration article discusses each checklist item and gives methodological background and published examples of transparent reporting. The STROBE checklist is best used in conjunction with this article (freely available on the Web sites of PLoS Medicine at <http://www.plosmedicine.org/>, Annals of Internal Medicine at <http://www.annals.org/>, and Epidemiology at <http://www.epidem.com/>). Information on the STROBE Initiative is available at [www.strobe-statement.org](http://www.strobe-statement.org).

## Supplementary references

1. Vignon P. Assessment of Pulmonary Arterial Pressure Using Critical Care Echocardiography: Dealing With the Yin and the Yang?\*. *Crit Care Med.* 2019;47:126–8.
2. Lang RM, Badano LP, Mor-Avi V, Afilalo J, Armstrong A, Ernande L, et al. Recommendations for Cardiac Chamber Quantification by Echocardiography in Adults: An Update from the American Society of Echocardiography and the European Association of Cardiovascular Imaging. *J Am Soc Echocardiogr.* 2015;28:1-39.e14.
3. Antoine Humeau / qlabRaw2RectangularData · GitLab [Internet]. GitLab. 2023 [cited 2023 Aug 23]. Available from: <https://gitlab.com/antoinehumeau/qlabraw2rectangulardata>
4. Sjoberg D D, Whiting K, Curry M, Lavery J A, Larmarange J. Reproducible Summary Tables with the gtsummary Package. *R J.* 2021;13:570.
5. Gu Z. Complex heatmap visualization. *iMeta.* 2022;1:e43.
6. Brunson JC. ggalluvial: Layered Grammar for Alluvial Plots. *J Open Source Softw.* 2020;5:2017.
7. Patil I. Visualizations with statistical details: The “ggstatsplot” approach. *J Open Source Softw.* 2021;6:3167.
